# Supplementary material
Source: HighWire-hosted journal article supplement (https://emj.bmj.com/content/40/7/482)
Supplement: inline-supplementary-material-1 [file inline-supplementary-material-1.pdf]

Understanding pre-hospital care for self-harm: views and experiences of Yorkshire Ambulance Service clinicians  
Daniel Romeu, Elspeth Guthrie, Suzanne Mason

### Supplementary file 1: Questionnaire

#### Section 1

1. Gender.

Male/Female/Non-binary/Prefer not to say

2. Job role.

Paramedic (any)/emergency medical technician (EMT1)/emergency care  
assistant/associate ambulance practitioner (AAP)/student paramedic/other (please  
specify)

3. Years of experience working for any ambulance service.

0-2/3-5/6-10/11-15/16-20/20+

4. Have you received any specific mental health training in your role?

Yes/No/Unsure

#### Section 2

1. Over the last two weeks, how often have you been called to assess and/or manage a patient after they have self-harmed?

0 times/1-2 times/3-5 times/6-10 times/>10 times

2. How confident do you feel when assessing and managing a patient who has self-harmed?

Very unconfident/somewhat unconfident/neither confident not unconfident/somewhat  
confident/very confident

3. How much do you think your training and education have prepared you to assess and manage a patient who has self-harmed?

Very inadequately/somewhat inadequately/neither inadequately nor  
adequately/somewhat adequately/very adequately

4. How easy is it to contact colleagues for advice on the management of a patient who has self-harmed when needed?

Understanding pre-hospital care for self-harm: views and experiences of Yorkshire Ambulance Service clinicians  
Daniel Romeu, Elspeth Guthrie, Suzanne Mason

[Very difficult/somewhat difficult/neither difficult nor easy/somewhat easy/very easy](#)

5. Do you have access to resources that are useful for the assessment and management of patients who have self-harmed?

[Yes/No/Unsure](#)

6. If you answered “Yes” to the previous question, please provide further details.

[Free-text](#)

7. In your clinical practice, please list any factors that help you in providing good clinical care to people who have self-harmed.

[Free-text](#)

8. In your clinical practice, please list any factors that interfere with you providing good clinical care to people who have self-harmed.

[Free-text](#)

9. Please list any suggestions you have to improve confidence and competence in mental healthcare among ambulance crew.

[Free-text](#)

10. How do you think the acute care pathway for people who self-harm could be improved?

[Free-text](#)
